# Supplementary material for: Elevated Depressive Symptoms, Antidepressant Use, and Diabetes in a Large Multiethnic National Sample of Postmenopausal Women
Source: PubMed Central journal article supplement — Diabetes Care. 2011 Oct 15;34(11):2390–2. doi: 10.2337/dc11-1223 (PMC3198287; doi:10.2337/dc11-1223), 2011-10-15
Supplement: supp_dc11-1223v111223_DC111223SupplementaryData.pdf [file supp_dc11-1223v111223_DC111223SupplementaryData.pdf]

## SUPPLEMENTARY DATA

### SHORT LIST OF WHI INVESTIGATORS

**Program Office:** (National Heart, Lung, and Blood Institute, Bethesda, Maryland) Jacques Rossouw, Shari Ludlam, Dale Burwen, Joan McGowan, Leslie Ford, and Nancy Geller

**Clinical Coordinating Center:** (Fred Hutchinson Cancer Research Center, Seattle, WA) Garnet Anderson, Ross Prentice, Andrea LaCroix, and Charles Kooperberg

**Investigators and Academic Centers:** (Brigham and Women's Hospital, Harvard Medical School, Boston, MA) JoAnn E. Manson; (MedStar Health Research Institute/Howard University, Washington, DC) Barbara V. Howard; (Stanford Prevention Research Center, Stanford, CA) Marcia L. Stefanick; (The Ohio State University, Columbus, OH) Rebecca Jackson; (University of Arizona, Tucson/Phoenix, AZ) Cynthia A. Thomson; (University at Buffalo, Buffalo, NY) Jean Wactawski-Wende; (University of Florida, Gainesville/Jacksonville, FL) Marian Limacher; (University of Iowa, Iowa City/Davenport, IA) Robert Wallace; (University of Pittsburgh, Pittsburgh, PA) Lewis Kuller; (Wake Forest University School of Medicine, Winston-Salem, NC) Sally Shumaker

**Women's Health Initiative Memory Study:** (Wake Forest University School of Medicine, Winston-Salem, NC) Sally Shumaker

*For a list of all the investigators who have contributed to WHI science, please visit: [http://www.whiscience.org/publications/WHI\\_investigators\\_longlist.pdf](http://www.whiscience.org/publications/WHI_investigators_longlist.pdf)*
